# Supplementary material for: Palpation and Ultrasonography Reveal an Ignored Function of the Inferior Belly of Omohyoid: A Case Series and a Proof-of-Concept Study
Source: MDPI journal article supplement (doi:10.3390/diagnostics13183004), 2023-09-20
Supplement: s1 [file s1]

**Table S1.** Described actions and innervation of omohyoid in Anatomy Textbooks

| Year | Author                        | Ed.              | Action on                               |        |                                                           | Innervation     |
|------|-------------------------------|------------------|-----------------------------------------|--------|-----------------------------------------------------------|-----------------|
|      |                               |                  | Hyoid bone                              | Fascia | Veins; other                                              |                 |
| 1901 | Poirier, Charpy               | 2 <sup>nd</sup>  | Stabilizes                              | Tenses | Maintains vein patency <sup>1</sup>                       | Ansa cervicalis |
| 1923 | Spalteholz                    | 7 <sup>th</sup>  | Pulls down                              | Tenses | NM*                                                       | Ansa cervicalis |
| 1948 | Testut, Latarjet              | 9 <sup>th</sup>  | Pulls down and back                     | NM     | No effect                                                 | Ansa cervicalis |
| 1959 | Orts Llorca                   | 2 <sup>nd</sup>  | Pulls down                              | Tenses | Maintains vein patency*                                   | Ansa cervicalis |
| 1969 | Lockhart, Hamilton, Fyfe      | 2 <sup>nd</sup>  | Pulls down                              | NM     | NM                                                        | Ansa cervicalis |
| 1975 | Basmajian (Grant's)           | 9 <sup>th</sup>  | Pulls down                              | NM     | NM                                                        | Ansa cervicalis |
| 1981 | Romanes                       | 12 <sup>th</sup> | Pulls down                              | NM     | NM                                                        | Ansa cervicalis |
| 1986 | O'Rahilly, Müller             | 5 <sup>th</sup>  | Pulls down                              | Tenses | Maintains vein patency; relieves pressure on lung apices* | Ansa cervicalis |
| 1999 | Rouvière, Delmas              | 10 <sup>th</sup> | Pulls down and back                     | NM     | NM                                                        | Ansa cervicalis |
| 2005 | Schuenke, Schulte, Schumacher |                  | Pulls down                              | Tenses | Maintains vein patency*                                   | Ansa cervicalis |
| 2021 | Standring                     | 42 <sup>nd</sup> | Pulls down                              | Tenses | It prevents suction inwards for the soft parts*           | Ansa cervicalis |
| 2023 | Dalley, Agur                  | 9 <sup>th</sup>  | Pulls down, retracts and steadies hyoid | NM     | NM                                                        | Ansa cervicalis |

<sup>1</sup>Possible actions involving the inferior belly of omohyoid

NM= not mentioned
