# Supplementary material for: Palpation and Ultrasonography Reveal an Ignored Function of the Inferior Belly of Omohyoid: A Case Series and a Proof-of-Concept Study
Source: MDPI journal article supplement (doi:10.3390/diagnostics13183004), 2023-09-20
Supplement: s1 [file s1]

**Table S2.** Diagnoses in 300 rheumatologic patients.

| <b>Diagnoses</b>             | <b>N</b> | <b>%</b> |
|------------------------------|----------|----------|
| Osteoarthritis               | 44       | 14.7     |
| Rheumatoid arthritis         | 39       | 13.0     |
| Primary Sjögren's syndrome   | 27       | 9.0      |
| Fibromyalgia                 | 18       | 6.0      |
| Gout                         | 11       | 3.7      |
| Systemic lupus erythematosus | 9        | 3.0      |
| Polymyalgia rheumatica       | 8        | 2.6      |
| Scleroderma                  | 6        | 2.0      |
| Other diagnoses              | 138      | 46.0     |
